# Supplementary material
Source: publisher figshare collection journal article supplement (https://geolsoc.figshare.com/ndownloader/files/5420726)
Supplement: Supplementary file 1 [file 5420726]

Hole 991A_Age (Ma)	Hole 991A_Sanders Values	Hole 994C_Age (Ma)	Hole 994C_Sanders Values	Hole 995A_Age (Ma)	Hole 995A_Sanders Values	Hole 997A_Age (Ma)	Hole 997A_Sanders Value
0.001	45.13	0.000	30.00	0.000	30.61	0.018	41.00
0.003	44.41	0.014	35.00	0.019	32.71	0.076	29.00
0.005	42.07	0.045	35.00	0.037	49.77	0.131	39.00
0.006	47.75	0.055	30.00	0.040	38.06	0.190	35.00
0.008	50.21	0.100	25.00	0.042	30.80	0.248	28.00
0.011	51.83	0.100	34.00	0.061	30.33	0.293	27.00
0.014	49.10	0.157	33.00	0.100	39.56	0.334	22.00
0.040	49.28	0.202	37.00	0.138	48.24	0.376	21.00
0.058	44.30	0.248	28.00	0.157	30.27	0.431	26.00
0.096	33.78	0.280	40.00	0.177	39.95	0.468	36.00
0.112	34.42	0.307	39.00	0.216	35.85	0.495	21.00
0.134	28.14	0.336	35.00	0.254	41.56	0.522	35.00
0.153	35.52	0.348	29.00	0.267	38.06	0.549	39.00
0.191	46.50	0.348	36.00	0.277	50.00	0.576	24.00
0.210	44.47	0.371	26.00	0.294	29.16	0.603	37.00
0.229	40.66	0.398	28.00	0.310	38.98	0.612	33.00
0.248	41.54	0.426	21.00	0.328	33.42	0.639	30.00
0.286	44.52	0.453	26.00	0.344	33.10	0.666	35.00
0.305	44.83	0.489	33.00	0.362	33.69	0.693	31.00
0.324	43.93	0.529	28.00	0.395	25.82	0.721	30.00
0.343	44.02	0.529	35.00	0.428	21.43	0.748	33.00
0.381	45.58	0.582	33.00	0.461	24.29	0.775	20.00
0.397	48.37	0.648	32.00	0.482	16.92	0.784	28.00
0.419	53.00	0.661	15.00	0.494	27.08	0.811	33.00
0.438	43.25	0.701	32.00	0.521	36.75	0.838	25.00
0.442	45.05	0.733	37.00	0.547	30.40	0.865	26.00
0.480	44.63	0.746	37.00	0.574	22.00	0.892	35.00
0.530	44.41	0.774	39.00	0.600	36.29	0.920	26.00
0.590	43.01	0.789	40.00	0.627	37.15	0.947	30.00
0.650	43.78	0.832	40.00	0.639	28.55	0.956	25.00
0.710	44.90	0.850	23.00	0.649	33.50	0.983	24.00
0.830	48.56	0.869	28.00	0.662	30.92	1.011	23.00
0.890	47.44	0.888	24.00	0.688	38.47	1.088	29.00
0.945	47.18	0.905	38.00	0.701	31.00	1.242	39.00
0.978	48.86	0.925	31.00	0.715	30.34	1.281	32.00
1.042	41.50	0.938	32.00	0.727	24.87	1.321	30.00
1.075	37.76	0.938	40.00	0.741	39.54	1.334	39.00
1.107	37.78	0.950	27.00	0.754	34.77	1.374	26.00
1.139	35.75	0.965	23.00	0.767	10.00	1.401	31.00
1.204	37.88	0.981	26.00	0.794	15.00	1.440	29.00
1.236	35.10	1.003	25.00	0.807	40.06	1.475	27.00
1.268	36.12	1.022	26.00	0.816	22.00	1.497	26.00
1.301	30.41	1.042	40.00	0.829	21.23	1.518	26.00
1.365	35.58	1.060	31.00	0.849	35.25	1.540	28.00
1.398	36.62	1.060	30.00	0.871	18.08	1.574	12.00
1.430	32.27	1.075	26.00	0.892	35.87	1.595	18.00
1.462	34.10	1.097	34.00	0.914	22.53	1.613	25.00
1.527	35.67	1.118	31.00	0.935	27.00	1.630	25.00
1.559	35.20	1.140	34.00	0.957	30.64	1.648	34.00
1.591	39.09	1.162	26.00	0.978	17.00	1.667	28.00
1.624	35.64	1.183	20.00	1.000	19.00	1.672	29.00
1.688	30.99	1.201	18.00	1.036	28.35	1.696	31.00
1.700	36.47	1.201	23.00	1.046	34.80	1.744	34.00
1.748	46.61	1.209	30.00	1.053	35.71	1.791	32.00
1.798	43.48	1.233	29.00	1.064	38.50	1.839	35.00
1.873	42.08	1.253	26.00	1.084	28.53	1.887	34.00
1.923	49.67	1.273	33.00	1.094	16.00	1.936	34.00
2.023	43.09	1.293	34.00	1.105	16.26	1.954	37.00
2.173	43.54	1.312	33.00	1.115	36.47	1.983	33.00
2.249	45.54	1.332	27.00	1.126	43.28	2.012	37.00
2.324	47.38	1.332	29.00	1.136	34.41	2.041	30.00
2.399	53.82	1.332	37.00	1.146	36.12	2.070	29.00
2.549	51.63	1.352	29.00	1.167	15.00	2.099	32.00
2.624	59.91	1.372	25.00	1.177	20.00	2.128	33.00
2.700	49.68	1.391	24.00	1.184	21.00	2.137	30.00
2.775	47.98	1.411	30.00	1.194	31.00	2.166	29.00
2.925	37.90	1.431	23.00	1.215	40.32	2.195	30.00
3.000	37.19	1.451	28.00	1.236	32.26	2.224	27.00
3.075	38.85	1.467	35.00	1.246	25.06	2.253	28.00
3.150	36.52	1.467	36.00	1.256	35.32	2.281	37.00
3.301	43.54	1.482	26.00	1.266	36.56	2.321	27.00
3.376	43.41	1.514	20.00	1.276	34.18	2.332	19.00
3.451	44.54	1.547	18.00	1.297	34.10	2.361	14.00
3.526	40.41	1.580	24.00	1.306	37.44	2.390	24.00
3.677	43.08	1.609	20.00	1.317	39.84	2.419	26.00
3.752	47.05	1.637	22.00	1.321	32.72	2.448	36.00
3.827	41.04	1.660	35.00	1.324	35.00	2.477	27.00
3.902	44.38	1.660	39.00	1.327	36.63	2.506	30.00
4.052	50.32	1.673	30.00	1.337	29.22	2.506	29.00
4.127	53.77	1.701	32.00	1.347	32.58	2.510	23.00
4.143	43.98	1.730	36.00	1.357	34.24	2.517	23.00
4.164	50.13	1.757	33.00	1.367	39.04	2.524	16.00
4.185	50.71	1.788	35.00	1.378	39.70	2.531	29.00
4.206	42.60	1.817	30.00	1.398	34.00	2.539	21.00
4.229	46.25	1.841	35.00	1.418	35.04	2.546	29.00
4.247	41.91	1.841	33.00	1.428	35.23	2.553	19.00
4.268	43.99	1.855	36.00	1.438	32.00	2.554	22.00
4.289	47.43	1.884	33.00	1.448	30.00	2.561	22.00
4.310	44.08	1.913	31.00	1.459	42.54	2.568	35.00
4.351	46.04	1.941	37.00	1.463	32.32	2.577	30.00
4.369	40.23	1.969	39.00	1.466	16.00	2.587	25.00
4.393	39.94	1.989	37.00	1.479	14.00	2.597	25.00
4.414	46.07	2.017	39.00	1.497	10.00	2.606	25.00
4.437	44.93	2.017	39.00	1.513	5.00	2.607	20.00
4.456	48.38	2.030	29.00	1.548	18.00	2.617	23.00
4.476	42.54	2.057	28.00	1.565	8.00	2.627	20.00
4.497	50.80	2.083	34.00	1.582	18.00	2.636	24.00
4.518	48.17	2.105	31.00	1.597	13.00	2.646	23.00
4.540	42.49	2.136	27.00	1.610	9.15	2.656	18.00
4.560	44.22	2.158	36.00	1.624	25.19	2.665	20.00
4.581	44.73	2.175	33.00	1.637	29.00	2.669	29.00
4.601	42.14	2.175	28.00	1.651	35.26	2.678	20.00
4.622	45.03	2.196	24.00	1.666	32.79	2.688	22.00
4.642	43.41	2.208	31.00	1.679	37.58	2.698	23.00
4.664	43.22	2.238	30.00	1.692	38.48	2.707	19.00
4.685	39.72	2.265	34.00	1.715	33.48	2.716	31.00
4.706	41.42	2.292	38.00	1.727	34.13	2.726	25.00
4.726	40.35	2.317	32.00	1.739	28.15	2.736	13.00
4.749	42.00	2.344	31.00	1.750	29.41	2.742	20.00
4.768	40.24	2.344	39.00	1.763	36.93	2.751	13.00
4.789	38.78	2.365	31.00	1.787	39.23	2.761	26.00
4.800	41.44	2.391	35.00	1.798	33.86	2.771	13.00
4.801	38.98	2.417	29.00	1.810	44.41	2.780	9.00
4.809	39.26	2.443	22.00	1.810	40.37	2.789	22.00
4.817	42.55	2.470	32.00	1.822	39.78	2.798	20.00
4.825	47.95	2.496	33.00	1.834	40.49	2.796	19.00
4.833	43.43	2.513	33.00	1.845	30.81	2.804	8.00
4.841	44.23	2.513	30.00	1.857	27.58	2.813	25.00
4.848	44.15	2.518	23.00	1.868	32.83	2.821	26.00
4.856	49.36	2.528	32.00	1.881	33.23	2.830	26.00
4.864	42.16	2.538	29.00	1.892	28.08	2.839	17.00
4.880	42.00	2.547	31.00	1.904	35.53	2.848	23.00
4.888	45.03	2.557	28.00	1.916	28.55	2.853	17.00
4.896	48.15	2.567	25.00	1.929	32.84	2.859	20.00
4.904	44.47	2.579	29.00	1.941	35.03	2.868	12.00
4.913	41.80	2.579	26.00	1.955	33.82	2.889	13.00
4.920	40.34	2.590	24.00	1.961	31.00	2.892	22.00
4.928	43.15	2.602	33.00	1.965	37.00	2.898	17.00
4.935	38.81	2.610	27.00	1.984	31.30	2.907	19.00
4.943	43.19	2.633	26.00	2.004	33.00	2.916	25.00
4.952	38.73	2.650	24.00	2.023	27.35	2.924	20.00
4.959	39.38	2.660	24.00	2.043	36.48	2.932	17.00
4.967	37.93	2.660	20.00	2.062	36.14	3.055	31.00
4.975	35.03	2.710	21.00	2.082	33.33	3.061	5.00
4.983	48.34	2.727	23.00	2.120	24.33	3.070	11.00
4.991	42.93	2.744	25.00	2.139	32.71	3.078	10.00
4.999	48.10	2.762	24.00	2.159	29.34	3.087	32.00
5.048	43.61	2.780	26.00	2.178	28.30	3.096	16.00
5.105	44.90	2.780	30.00	2.198	39.24	3.111	23.00
5.172	30.78	2.783	29.00	2.207	38.47	3.119	15.00
5.222	32.32	2.797	34.00	2.211	39.13	3.128	34.00
5.240	35.70	2.810	13.00	2.229	23.62	3.137	19.00
5.259	33.73	2.823	27.00	2.249	31.38	3.143	20.00
5.264	40.38	2.835	19.00	2.268	35.00	3.152	32.00
5.273	2.00	2.835	17.00	2.288	37.76	3.166	6.00
5.292	7.00	2.867	35.00	2.327	34.32	3.175	19.00
5.312	1.00	2.877	39.00	2.366	25.00	3.183	17.00
5.332	2.00	2.890	32.00	2.384	24.79	3.228	18.00
5.353	0.00	2.901	39.00	2.404	27.00	3.237	27.00
5.371	3.00	2.913	37.00	2.423	10.00	3.245	23.00
5.391	0.00	2.927	14.00	2.443	33.86	3.278	26.00
5.411	0.00	2.940	26.00	2.449	27.00	3.286	19.00
5.430	0.00	2.940	17.00	2.468	28.50	3.295	15.00
5.452	0.00	2.954	25.00	2.505	24.23	3.304	19.00
5.470	0.00	2.968	17.00	2.522	31.48	3.312	23.00
5.489	0.00	2.981	18.00	2.528	26.49	3.321	26.00
5.509	0.00	2.995	17.00	2.535	27.84	3.333	22.00
5.529	0.00	3.008	21.00	2.541	19.00	3.342	20.00
5.568	0.00	3.008	24.00	2.548	28.00	3.350	25.00
5.588	0.00	3.041	15.00	2.562	21.51	3.360	28.00
5.608	0.00	3.054	10.00	2.568	32.24	3.368	34.00
5.627	0.00	3.067	22.00	2.576	16.00	3.376	34.00
5.667	12.00	3.127	27.00	2.579	17.00	3.394	15.00
5.686	10.00	3.150	23.00	2.585	29.00	3.403	21.00
5.706	29.81	3.154	14.00	2.593	28.00	3.411	17.00
5.726	26.00	3.169	21.00	2.601	20.07	3.420	24.00
5.765	0.00	3.181	19.00	2.609	19.00	3.444	16.00
5.785	1.00	3.181	21.00	2.616	18.00	3.451	13.00
5.805	11.00	3.213	22.00	2.624	25.65	3.460	17.00
5.824	20.00	3.226	28.00	2.632	22.97	3.468	15.00
5.846	4.00	3.238	27.00	2.640	20.14	3.477	10.00
5.864	14.00	3.238	22.00	2.656	21.47	3.499	20.00
5.884	13.00	3.292	17.00	2.664	16.00	3.501	32.00
5.900	22.00	3.384	20.00	2.669	24.94	3.509	14.00
		3.396	25.00	2.680	17.00	3.518	11.00
		3.396	28.00	2.688	20.00	3.527	10.00
		3.473	31.00	2.704	20.00	3.554	19.00
		3.483	29.00	2.712	29.00	3.563	25.00
		3.496	25.00	2.720	18.00	3.572	12.00
		3.506	29.00	2.729	20.00	3.581	13.00
		3.515	23.00	2.736	11.00	3.589	19.00
		3.515	26.00	2.744	19.00	3.598	10.00
		3.569	18.00	2.752	24.09	3.610	13.00
		3.583	23.00	2.768	20.00	3.619	17.00
		3.596	21.00	2.776	13.00	3.627	15.00
		3.608	23.00	2.782	14.00	3.636	9.00
		3.621	30.00	2.784	16.00	3.645	11.00
		3.628	19.00	2.789	17.00	3.662	21.00
		3.628	19.00	2.793	12.00	3.669	26.00
		3.640	19.00	2.798	15.00	3.683	15.00
		3.652	21.00	2.803	6.00	3.690	18.00
		3.652	27.00	2.807	15.00	3.697	18.00
		3.688	22.00	2.814	15.00	3.712	18.00
		3.694	24.00	2.839	8.00	3.719	26.00
		3.700	24.00	2.844	9.00	3.725	14.00
		3.707	21.00	2.853	1.00	3.732	21.00
		3.709	21.00	2.857	13.00	3.739	22.00
		3.709	22.00	2.862	8.00	3.776	19.00
		3.728	32.00	2.872	12.00	3.868	19.00
		3.793	20.00	2.874	16.00	4.235	18.00
		3.803	28.00	2.899	18.00	4.254	25.00
		3.817	22.00	2.903	15.00	4.272	29.00
		3.817	20.00	2.908	11.00	4.284	16.00
		3.889	22.00	2.913	17.00	4.357	21.00
		3.889	21.00	2.922	16.00	4.376	24.00
		3.972	20.00	2.926	18.00	4.395	17.00
		3.981	22.00	2.931	14.00	4.414	16.00
		3.981	22.00	2.940	12.00	4.433	16.00
		4.060	16.00	2.958	16.00	4.451	16.00
		4.060	14.00	2.963	10.00	4.598	23.00
		4.149	21.00	2.967	12.00	4.617	18.00
		4.162	29.00	2.972	14.00	4.652	20.00
		4.176	16.00	2.982	14.00	4.671	18.00
		4.184	13.00	2.986	7.00	4.689	12.00
		4.184	20.00	2.991	6.00	4.720	23.00
		4.260	16.00	3.000	12.00	4.735	22.00
		4.281	15.00	3.004	14.00	4.755	9.00
		4.296	15.00	3.018	18.00	4.842	10.00
		4.314	18.00	3.023	30.00	4.861	7.00
		4.335	20.00	3.032	16.00	4.880	16.00
		4.357	17.00	3.035	13.00	4.899	17.00
		4.373	16.00	3.078	14.00	4.918	11.00
		4.373	16.00	3.083	12.00	4.936	16.00
		4.398	14.00	3.092	13.00	4.963	20.00
		4.409	21.00	3.097	21.00	4.975	14.00
		4.420	21.00	3.101	16.00	5.083	17.00
		4.430	19.00	3.111	31.02	5.096	11.00
		4.435	18.00	3.115	33.88	5.115	12.00
		4.435	11.00	3.116	21.00	5.134	11.00
		4.466	23.00	3.138	11.00	5.152	20.00
		4.473	16.00	3.146	9.00	5.171	9.00
		4.485	17.00	3.148	15.00	5.190	15.00
		4.496	24.00	3.197	24.00	5.209	11.00
		4.496	21.00	3.202	20.00	5.339	9.00
		4.535	30.00	3.204	23.00	5.358	15.00
		4.547	25.00	3.208	30.89	5.377	11.00
		4.547	28.00	3.213	22.00	5.396	12.00
		4.611	10.00	3.218	12.00	5.445	17.00
		4.615	18.00	3.222	6.00
		4.625	11.00	3.227	18.00
		4.637	9.00	3.236	16.00
		4.637	16.00	3.241	11.00
		4.671	14.00	3.246	19.00
		4.685	15.00	3.255	9.00
		4.696	13.00	3.259	20.00
		4.707	18.00	3.261	12.00
		4.716	24.00	3.265	24.00
		4.738	24.00	3.270	12.00
		4.750	17.00	3.275	21.00
		4.761	32.00	3.279	33.00
		4.767	29.00	3.320	21.00
		4.773	14.00	3.325	16.00
		4.784	29.00	3.330	18.00
		4.794	24.00	3.342	28.00
		4.803	15.00	3.355	20.00
		4.803	26.00	3.360	14.00
		4.811	22.00	3.380	22.00
		4.822	29.00	3.385	22.00
		4.830	22.00	3.394	24.85
		4.830	24.00	3.399	21.00
		4.880	21.00	3.403	25.00
		4.891	16.00	3.408	23.71
		4.891	14.00	3.413	21.00
		4.950	17.00	3.417	12.00
		4.960	11.00	3.422	13.00
		4.971	10.00	3.430	14.00
		4.971	13.00	3.432	13.00
		5.006	19.00	3.440	11.00
		5.011	20.00	3.444	16.00
		5.015	23.00	3.454	21.00
		5.020	22.00	3.499	22.00
		5.023	19.00	3.504	18.00
		5.023	24.00	3.513	10.00
		5.037	20.00	3.518	19.00
		5.040	13.00	3.523	18.00
		5.043	23.00	3.527	11.00
		5.045	24.00	3.531	9.00
		5.045	16.00	3.559	11.00
		5.067	17.00	3.564	25.00
		5.071	16.00	3.568	22.00
		5.076	30.00	3.619	18.00
		5.079	20.00	3.623	13.00
		5.079	32.00	3.633	22.00
		5.096	25.00	3.637	14.00
		5.100	19.00	3.642	15.00
		5.106	25.00	3.651	15.00
		5.106	23.00	3.652	11.00
		5.106	32.00	3.674	21.00
		5.125	31.00	3.678	9.00
		5.129	13.00	3.679	11.00
		5.133	25.00	3.681	13.00
		5.133	33.00	3.726	27.00
		5.154	24.00	4.093	23.00
		5.157	23.00	4.161	11.00
		5.161	18.00	4.207	11.00
		5.165	22.00	4.232	23.00
		5.168	8.00	4.240	18.00
		5.168	17.00	4.415	27.28
		5.181	19.00	4.418	17.00
		5.187	13.00	4.421	6.00
		5.191	18.00	4.427	8.00
		5.196	15.00	4.459	13.00
		5.200	13.00	4.463	14.00
		5.203	12.00	4.503	11.00
		5.207	9.00	4.507	16.00
		5.212	12.00	4.517	18.00
		5.212	21.00	4.521	14.00
		5.213	29.00	4.528	12.00
		5.217	21.00	4.529	16.00
		5.222	26.00	4.548	23.00
		5.227	17.00	4.551	14.00
		5.231	20.00	4.558	11.00
		5.233	20.00	4.561	10.00
		5.233	19.00	4.565	12.00
		5.241	14.00	4.568	20.00
		5.244	12.00	4.572	19.00
		5.248	19.00	4.575	14.00
		5.253	17.00	4.579	15.00
		5.258	16.00	4.581	10.00
		5.262	29.00	4.592	16.00
		5.265	10.00	4.596	13.00
		5.265	9.00	4.603	13.00
		5.271	11.00	4.606	10.00
		5.276	18.00	4.608	11.00
		5.280	16.00	4.636	10.00
		5.285	22.00	4.641	10.00
		5.290	15.00	4.644	11.00
		5.290	12.00	4.649	16.00
		5.299	14.00	4.653	12.00
		5.299	26.00	4.656	7.00
		5.328	14.00	4.663	14.00
		5.333	23.00	4.667	13.00
		5.337	13.00	4.670	16.00
		5.345	18.00	4.674	10.00
		5.355	23.00	4.680	12.00
		5.365	17.00	4.684	14.00
		5.374	20.00	4.687	14.00
		5.378	23.00	4.691	9.00
		5.378	20.00	4.698	10.00
		5.385	14.00	4.701	8.00
		5.390	22.00	4.705	11.00
		5.401	13.00	4.712	27.00
		5.412	20.00	4.713	17.00
		5.421	26.00	4.730	7.00
		5.432	21.00	4.733	16.00
		5.443	22.00	4.736	3.00
		5.443	22.00	4.740	13.00
		5.455	28.00	4.747	17.00
		5.466	14.00	4.750	18.00
		5.476	17.00	4.754	14.00
		5.487	18.00	4.759	11.00
		5.497	21.00	4.769	16.00
		5.509	13.00	4.773	9.00
		5.509	22.00	4.776	7.00
		5.532	21.00	4.780	7.00
		5.543	27.00	4.786	7.00
		5.554	19.00	4.790	7.00
		5.554	17.00	4.793	11.00
		5.594	26.00	4.797	9.00
		5.608	23.00	4.800	12.00
		5.608	29.00	4.807	11.00
		5.702	11.00	4.811	9.00
		5.719	14.00	4.811	5.00
		5.728	11.00	4.813	9.00
		5.743	20.00	4.817	7.00
		5.761	14.00	4.820	8.00
		5.776	13.00	4.824	5.00
		5.776	12.00	4.831	12.00
		5.808	13.00	4.834	11.00
		5.817	12.00	4.838	11.00
		5.835	25.00	4.841	16.00
		5.850	19.00	4.848	9.00
		5.864	27.00	4.849	7.00
		5.864	21.00	4.862	15.00
		5.921	24.00	4.866	10.00
		5.936	26.00	4.869	16.00
		5.949	16.00	4.872	4.00
		5.964	21.00	4.879	10.00
		5.978	22.00	4.883	11.00
		5.988	25.00	4.886	15.00
		5.988	24.00	4.889	8.00
		6.015	15.00	4.893	13.00
		6.030	20.00	4.900	9.00
		6.044	12.00	4.902	14.00
		6.059	23.00	4.903	9.00
		6.074	24.00	4.905	13.00
		6.088	31.00	4.908	13.00
		6.096	28.00	4.912	7.00
		6.096	24.00	4.919	14.00
		6.107	14.00	4.926	12.00
		6.117	19.00	4.929	10.00
		6.127	19.00	4.936	7.00
		6.143	14.00	4.946	5.00
		6.155	17.00	4.950	12.00
		6.164	15.00	4.957	24.00
		6.171	15.00	4.959	2.00
		6.171	9.00	4.960	15.00
		6.202	16.00	4.990	9.00
		6.217	19.00	4.994	7.00
		6.231	25.00	5.000	4.00
		6.239	17.00	5.003	12.00
		6.239	16.00	5.006	15.00
		6.295	19.00	5.023	10.00
		6.306	24.00	5.027	9.00
		6.321	20.00	5.030	15.00
		6.333	14.00	5.035	20.00
		6.342	22.00	5.038	12.00
		6.355	22.00	5.040	15.00
		6.364	13.00	5.052	17.00
		6.364	15.00	5.055	16.00
		6.385	11.00	5.059	12.00
		6.394	24.00	5.062	18.00
		6.408	24.00	5.067	16.00
		6.423	20.00	5.081	13.00
		6.438	19.00	5.083	16.00
		6.451	13.00	5.085	15.00
		6.467	19.00	5.087	17.00
		6.467	15.00	5.092	14.00
		6.476	17.00	5.094	21.00
		6.485	27.00	5.109	16.00
		6.500	15.00	5.112	19.00
		6.515	16.00	5.115	14.00
		6.530	26.00	5.117	19.00
		6.544	18.00	5.121	18.00
		6.554	19.00	5.125	16.00
		6.554	15.00	5.126	9.00
		6.576	20.00	5.129	16.00
		6.584	16.00	5.131	21.00
		6.667	24.00	5.135	22.00
		6.679	19.00	5.138	8.00
		6.691	25.00	5.140	18.00
		6.691	10.00	5.144	15.00
		6.763	10.00	5.146	8.00
		6.778	10.00	5.153	15.00
		6.792	18.00	5.155	16.00
		6.807	17.00	5.157	14.00
		6.820	20.00	5.167	18.00
		6.833	10.00	5.171	9.00
		6.840	23.00	5.173	15.00
		6.840	16.00	5.175	9.00
				5.180	9.00
				5.182	16.00
				5.182	10.00
				5.196	13.00
				5.198	14.00
				5.201	17.00
				5.203	10.00
				5.205	21.00
				5.207	21.00
				5.210	27.00
				5.212	15.00
				5.216	9.00
				5.218	19.00
				5.221	12.00
				5.225	8.00
				5.227	13.00
				5.229	10.00
				5.232	14.00
				5.236	9.00
				5.240	9.00
				5.254	12.00
				5.256	16.00
				5.258	13.00
				5.260	13.00
				5.262	12.00
				5.267	16.00
				5.271	8.00
				5.275	13.00
				5.282	16.00
				5.285	14.00
				5.287	20.00
				5.289	18.00
				5.294	14.00
				5.298	21.00
				5.300	11.00
				5.311	19.00
				5.313	15.00
				5.316	12.00
				5.318	20.00
				5.322	19.00
				5.327	28.00
				5.331	16.00
				5.334	12.00
				5.336	17.00
				5.338	12.00
				5.339	11.00
				5.340	17.00
				5.367	9.00
				5.421	13.00
				5.444	12.00
				5.477	18.00
				5.612	14.00
				5.618	8.00
				5.622	8.00
				5.626	11.00
				5.634	9.00
				5.638	7.00
				5.642	13.00
				5.650	16.00
				5.654	16.00
				5.658	10.00
				5.662	8.00
				5.663	11.00
				5.664	11.00
				5.668	11.00
				5.672	7.00
				5.715	7.00
				5.727	13.00
				5.731	9.00
				5.735	6.00
				5.739	9.00
				5.747	15.00
				5.751	9.00
				5.755	9.00
				5.759	9.00
				5.766	3.00
				5.770	10.00
				5.774	14.00
				5.778	7.00
				5.781	12.00
				5.817	8.00
				5.821	6.00
				5.825	8.00
				5.829	13.00
				5.833	10.00
				5.837	12.00
				5.841	13.00
				5.845	12.00
				5.853	11.00
				5.856	15.00
				5.868	6.00
				5.872	7.00
				5.876	12.00
				5.879	10.00
				5.935	10.00
				5.944	11.00
				5.951	12.00
				5.958	18.00
				5.972	24.00
				5.978	15.00
				6.024	10.00
				6.031	16.00
				6.037	13.00
				6.114	15.00
				6.121	9.00
				6.128	26.00
				6.142	12.00
				6.203	22.00
				6.217	15.00
				6.224	12.00
				6.234	13.00
				6.248	6.00
				6.293	9.00
				6.300	14.00
				6.306	7.00
				6.313	9.00
				6.320	15.00
				6.327	13.00
				6.334	19.00
				6.341	10.00
				6.348	12.00
				6.355	19.00
				6.369	6.00
				6.377	17.00
				6.382	6.00
				6.394	13.00
				6.401	15.00
				6.408	12.00
				6.415	18.00
				6.422	6.00
				6.429	14.00
				6.438	16.00
				6.471	12.00
				6.478	13.00
				6.485	19.00
				6.492	19.00
				6.499	14.00
				6.506	14.00
				6.513	16.00
				6.520	20.00
				6.534	17.00
				6.548	18.00
				6.557	20.00
